# Supplementary material
Source: PubMed Central journal article supplement (PMC5482545)

1 **Supplement Material**

2 **Materials and Methods**

3 **Animals** The subcommittee on research for animal care at the Massachusetts General  
4 Hospital approved the experimental protocol. CC10-IL-6 transgenic mice (Tg(+)) were  
5 bred on a C57/BL6 (Tg(-)) background.<sup>1</sup> In these mice, the Clara cell 10-kD promoter  
6 (CC10) was used to constitutively drive lung-specific expression of IL-6. Tg(-)  
7 littermates served as controls in all experiments. Five Tg(-) and five Tg(+) mice, age-  
8 and sex-matched, were exposed to room air (21% FiO<sub>2</sub>) and then another five Tg(-) and  
9 five Tg(+) mice age- and sex-matched, were exposed to hypoxia (10% FiO<sub>2</sub>) at sea level.  
10 All animals were 3 months old and weighed  $22.5 \pm 2.0$  grams.

11  
12 For hypoxia, animals were placed in a sealed chamber. The O<sub>2</sub> concentration in the  
13 chamber was maintained at 10% by controlling the inflow rate of compressed air and N<sub>2</sub>.  
14 Gas was circulated in the chamber with a fan. The CO<sub>2</sub> concentration was maintained at  
15 < 0.4% with a CO<sub>2</sub> absorbent. Gas samples were tested twice per day during the entire  
16 experimental period to monitor O<sub>2</sub> and CO<sub>2</sub> tension. The chamber was unsealed for less  
17 than 30 minutes twice per week to replenish the food, replace CO<sub>2</sub> absorbent and clean  
18 the cages.

19  
20 **Measurement of right ventricular systolic pressure (RVSP)** All mice were  
21 administered ketamine (80 mg/kg) and diazepam (5 mg/kg), which produced anesthesia  
22 with spontaneous breathing. A midline sternal skin incision was made from the second  
23 intercostal space to the xiphoid process. A 25-gauge needle was attached to a male/male

1 luer slip connector, which was joined, in a successive order, to an 18-gauge blunt needle,  
2 polyethylene 190 tubing (ID 1.19 mm; OD 1.70 mm), 18-gauge blunt needle connected to  
3 a physiological transducer (Becton Dickinson DTXPlusDT-XX) via a two-way plastic  
4 stopcock. The stopcock facilitated flushing of the needle and *in situ* measurement of  
5 atmospheric pressure without introducing air bubbles. The entire system was flushed  
6 with sterile saline to eliminate bubbles. The transducer was positioned 1.0 cm above the  
7 level of the midaxillary line. The needle was then inserted into the right ventricle by  
8 following a 45° trajectory between the right second and third intercostal space above the  
9 xiphoid process. Pressures were recorded on a Gould chart recorder (Model RS3400)  
10 with an embedded Gould transducer amplifier (Model 13-4615-50) at paper speeds  
11 ranging from 2.5 to 200 mm/s. Peak RVSPs were obtained, as previously described.<sup>2</sup>  
12 Placement of the needle into the right ventricle was confirmed by postmortem  
13 examination.

14

15 **Heart weight** The right ventricular free wall was detached and removed under a  
16 dissecting microscope. The left ventricle and septum were weighed separately from the  
17 right ventricle, with measurements being taken after drying at 90°C for 24 h and 48 h. If  
18 the difference between the two readings was greater than  $\pm 0.5$  mg, the specimens were  
19 dried for another 24 h.<sup>2</sup>

20

21 **Histology of pulmonary vasculature and heart** The heart and lungs were flushed with  
22 normal saline, removed and fixed in formalin for 72 h. The aorta was removed under a  
23 dissecting microscope to access the pulmonary trunk. Two 3-cm silicone tubes (0.03 cm

1 × 0.05 cm; SMI, Saginaw, MI) were inserted into the pulmonary trunk through a small  
2 opening that was made in the lateral wall to maintain vessel wall patency during fixation.  
3 One tube was advanced through the main artery into the right pulmonary artery while  
4 another tube was inserted into the left pulmonary artery until resistance was encountered  
5 at their respective hila. Both main branches of the PA were lifted away from the heart  
6 and lungs, using the tubing as an aid. The tubing was removed before tissue embedding.  
7 Both the formalin-inflated left lung and the whole heart were sliced into 5 µm-thick  
8 sections. Slices of the lung, heart, main pulmonary branches, and pulmonary trunk were  
9 dehydrated and embedded in paraffin. Sections were then stained with hematoxylin &  
10 eosin, elastic, and giemsa stains.

11

12 **Assessment of pulmonary remodeling** Pulmonary remodeling was assessed by the  
13 percent wall thickness of the main PA branches (central) and parenchymal PA vessels  
14 indexed to terminal bronchioles and acini (i.e., vessels indexed to respiratory bronchioles  
15 or alveolar ducts).<sup>3</sup> Wall thickness was measured with an ocular micrometer and  
16 expressed as the medial wall thickness (the distance between the internal and external  
17 lamina) divided by the diameter of the vessel (the distance between the external lamina) ×  
18 100 (% wall thickness; %WT). For vessels with a single elastic lamina, the distance  
19 between the elastica and endothelial basement membrane was measured.<sup>2</sup> The total  
20 number of peripheral arteries was expressed as the number of arteries per every 100  
21 alveoli in each field and was verified using sections in which the vessels were stained  
22 with elastin.<sup>4</sup> A quantitative analysis of luminal obstruction was performed by counting  
23 at least 50 small pulmonary arterioles (outer diameter < 50 µm) in every hematoxylin-

1 eosin stained lung section. These arterioles were assessed for occlusive lesions and  
2 scored as follows: (1) no evidence of lumen occlusion (open), (2) partial (< 50%) luminal  
3 occlusion, and (3) full luminal occlusion (closed).<sup>5</sup> All morphometric analyses were  
4 performed by one blinded observer.

5  
6 **Antibodies** Antibodies used for immunohistochemistry included rat anti-mouse B220  
7 antigen (1:100; Clone RA3-6B2, BD Biosciences, San Diego, CA), rabbit polyclonal  
8 anti-human CD3 (1:400), polyclonal antibody to factor VIII-related antigen (1:250,  
9 Dakocytomation, Carpinteria, CA), and biotinylated goat anti-rabbit IgG (1:200; Vector  
10 laboratories, Inc., Burlingame, CA). Mouse monoclonal FLK-1 (VEGF-R2, Clone A3,  
11 Santa Cruz Biotechnology, Inc., Santa Cruz, CA) was used at a dilution of 1:200 for  
12 immunoblot and 1:50 for immunohistochemistry. Anti-actin smooth muscle specific  
13 (AB-2) mouse mAb(1A4) (1:750; EMD Chemicals, Inc., Gibbstown, NJ). Antibodies  
14 used for immunoblot include mouse monoclonal VEGF antibody ( 1:1000; Abcam,  
15 Cambridge, MA), TGF- $\beta$  antibody (rabbit polyclonal antibody; 1:1000), TNF- $\alpha$  (rabbit  
16 polyclonal antibody; 1:200), goat anti-rabbit IgG -HRP(1:2000), p38 (rabbit monoclonal  
17 antibody total 1:500 and phosphorylated 1:200), JNK (rabbit polyclonal antibody total  
18 1:500 and phosphorylated JNK 1:50), c-MYC (rabbit polyclonal antibody 1:200),  $\beta$ -actin  
19 (rabbit polyclonal antibody, 1:2000), caspase 3 (rabbit polyclonal antibody 1:200),  
20 cleaved caspase 3 (rabbit monoclonal antibody 1:200), survivin (rabbit polyclonal  
21 antibody 1:400), Bcl-2 (rabbit polyclonal antibody 1:200) and BAX (rabbit polyclonal  
22 antibody 1:400) from Cell Signaling Technology, Inc; Danvers, MA), PDGF-B (rabbit  
23 polyclonal antibody 1:100), MCP-1 (rabbit polyclonal antibody 1:100), ERK1/2 (rabbit

1 polyclonal, 1:500; Clone 14), and MAX (rabbit polyclonal antibody; 1:50) from Santa  
2 Cruz Biotechnology, Inc., Santa Cruz, CA. Goat anti-mouse IgG (1:2000; Jackson  
3 Immunoresearch Laboratories, Philadelphia, PA), anti-fractalkine (0.1 µg/ml; cleaved c-  
4 CX<sub>3</sub>CL1 [30 kDa] and total CX<sub>3</sub>CL1, R & D Systems, Inc., Minneapolis, MN).<sup>6</sup> Purified  
5 mouse anti-NF-ATc3 monoclonal antibody (1:200; BD Biosciences, Franklin Lakes, NJ).

6

7 **Immunohistochemistry** Formalin-fixed, paraffin-embedded tissue sections were baked  
8 for 10 min at 60°C, deparaffinized, and rehydrated. For antigen retrieval, tissues were  
9 rinsed in water and heated in a Decloaker pressure cooker in 0.01M Na-citrate (pH 6.0)  
10 for 3 min. The Na-citrate bath was returned to room temperature (RT) before the sections  
11 were rinsed in water. Endogenous peroxidase activity was quenched by treating sections  
12 with 3% H<sub>2</sub>O<sub>2</sub> for 5 min. Sections were then washed in phosphate-buffered saline (PBS)  
13 and successively blocked for 15 min at RT with appropriate serum, avidin, and biotin.  
14 Tissue sections were incubated with primary antibodies overnight at 4°C, washed with  
15 PBS, and if necessary (if primary was not biotinylated), incubated with secondary  
16 biotinylated antibody for 1 h at RT. Bound antibodies were detected by treating sections  
17 with streptavidin-horseradish peroxidase complex for 30 min. Peroxidase activity was  
18 visualized with 3,3' diaminobenzidine, and sections were counterstained with  
19 hematoxylin. Primary antibody was omitted from staining reactions as a negative  
20 control. Thymus and spleen tissue served as positive controls for leukocyte staining.

21

22 **Immunoblotting** Frozen lung tissue was homogenized for 30 min on ice in RIPA buffer  
23 (50 mM Tris-HCl [pH 7.4], 150 mM NaCl, 1% NP-40, 0.5% sodium deoxycholate, 0.1%

1 SDS; Boston BioProducts, Worcester, MA) supplemented with phosphatase inhibitor  
2 (Calbiochem, La Jolla, CA) and protease inhibitor (Calbiochem). Homogenates were  
3 centrifuged at 2000 rpm at 4°C for 30 min, and centrifugation was repeated on the  
4 supernatants. The protein concentration of the resulting supernatant was determined  
5 using Bradford reagent (Bio-Rad Laboratories, Hercules, CA). Proteins (70 µg) were  
6 electrophoresed on 4 – 20% gradient Tris-Hepes-SDS gels (Pierce, Rockford IL) and  
7 transferred to Immobilon PVDF membranes (Millipore Corporation, Bedford, MA).  
8 Prestained molecular mass marker proteins (Bio-Rad Laboratories) were used as  
9 standards for the Tris-Hepes-SDS gel electrophoresis. The PVDF membranes were  
10 blocked with 5% non-fat dry milk in Tris-Buffered Saline containing 0.1% tween-20  
11 (TBST) for 1 h at RT, washed with TBST, and probed with primary antibody diluted in  
12 blocking buffer for 2 h at RT. The membrane was subsequently washed, incubated with  
13 secondary antibody diluted in blocking buffer for 1 h at RT. Antibody labeling was  
14 visualized using chemiluminescence reagent (Cell Signaling Technology).

15  
16 **TdT-mediated dUTP nick end labeling staining.** End labeling of exposed 3'-OH ends  
17 of DNA fragments was undertaken with the TdT-mediated dUTP nick end labeling  
18 (TUNEL) in situ cell death detection kit (FragEL, Calbiochem, La Jolla, CA).

19  
20 **Statistical analysis.** Data are expressed as mean ± s.e.m. Multiple comparisons were  
21 made using the non-parametric Kruskal-Wallis test, and statistical significance ( $p \leq 0.05$ )  
22 between two groups was confirmed using the non-parametric Wilcoxon-Mann-Whitney  
23 test. Statistics were performed using Statview 4.5 (Abacus Concepts, Inc., Berkeley,

1 CA). In all experiments, n is equal to 5 replicates apart from immunoblots where the n is  
2 equal to 4 replicates.

### 3 4 **Results**

#### 5 6 **IL-6 overexpression increases pulmonary artery pressure and ventricular** 7 **hypertrophy (expanded)**

8 To test the hypothesis that increased IL-6 may cause increased PVR and PAH, we  
9 measured the right ventricular systolic pressure (RVSP) by direct right ventricular  
10 puncture, in transgenic mice over expressing IL-6 (Tg(+)). Under normoxic conditions,  
11 Tg(+) mice had elevated RVSP compared to Tg(-) mice ( $34 \pm 2$  mmHg vs.  $21 \pm 1$  mmHg,  
12  $p < 0.05$ , Figure 1a). In Tg(+) mice, 3 weeks of exposure to 10% oxygen almost doubled  
13 RVSP to  $64 \pm 7$  mmHg ( $p < 0.05$  vs. normoxic), and this value was almost 2.6 times  
14 higher than the RVSP in hypoxic Tg(-) mice ( $24 \pm 1$  mmHg,  $p < 0.05$ , Figure 1a). As in  
15 C57B1/6 mice,<sup>7</sup> Tg(-) mice did not exhibit any significant increase in RVSP in response  
16 to hypoxia (compared to normoxic controls).

17 Ventricular wall thickness increased in response to chronic pressure overload,  
18 which is a consequence of elevated resistance in the pulmonary artery (PA). Right  
19 ventricular hypertrophy (RVH), as measured by right ventricle weight / (left ventricle  
20 weight + septum weight; RV/LV+S) and absolute right ventricle weight (RV), were  
21 greater in Tg(+) mice than in Tg(-) mice under normoxic conditions (RV/LV+S:  $0.4 \pm$   
22  $0.02$  vs.  $0.3 \pm 0.02$ ,  $p < 0.05$ , Figure 1b and RV:  $0.007 \pm 0.0001$  gm vs.  $0.005 \pm 0.00001$   
23 gm,  $p < 0.05$ , Figure 1 b, c). Hypoxia produced even greater RVH in Tg(+) mice  
24 (RV/LV+S:  $0.7 \pm 0.1$ , and RV:  $0.01 \pm 0.001$  gm,  $p < 0.05$  vs. normoxic control) while  
25 there was no change in ventricular wall thickness in Tg(-) mice (Figure 1c). The absolute

1 left ventricle weight remained unchanged between groups (data not shown). The  
2 histological appearance of the hearts was consistent with RVH measurements, showing  
3 that, in both normoxic and hypoxic conditions, right ventricular wall mass was greater in  
4 Tg(+) mice (Figure 1d).

5  
6 **IL-6 overexpression induced muscularization throughout the entire pulmonary**  
7 **vascular bed (expanded)**

8 To determine the cause of increased PVR, we examined specific regions of the  
9 pulmonary vascular tree for remodeling. Examination of the proximal branches of the  
10 main PA revealed that the elastic lamina was increased in normoxic Tg(+) mice  
11 compared to their Tg(-) counterparts (Figure 2 c vs. a) and was quantitatively confirmed  
12 by counting the number of elastic lamina ( $3 \pm 0.3$  vs.  $2 \pm 0.0$ ,  $p < 0.05$ ; Figure 2q).  
13 Following hypoxia, the number of elastic lamina in Tg(+) mice was increased to  $10 \pm$   
14  $1$  (figure 2d), which exceeded the number in normoxic Tg(+) mice ( $p < 0.05$ ) and hypoxic  
15 Tg(-) littermates ( $2 \pm 0.3$ ,  $p < 0.05$ ; Figure 2q). No differences in the number of elastic  
16 lamina between normoxic and hypoxic Tg(-) mice were observed. Main PA branches in  
17 Tg(+) mice exhibited an increase in not only the number of elastic lamina, but also the  
18 percent vessel medial wall thickness, relative to the Tg(-) control, under both normoxic  
19 ( $7 \pm 1\%$  vs.  $3 \pm 1\%$ ,  $p < 0.05$ ) and hypoxic conditions ( $15 \pm 1\%$  vs.  $6 \pm 1\%$ ,  $p < 0.05$ ; Figure  
20 2r). The medial wall of the main PA branches in Tg(+) mice more than doubled in  
21 thickness in response to hypoxia compared to their Tg(+) normoxic controls ( $15 \pm 1\%$  vs.  
22  $7 \pm 1\%$ ,  $p < 0.05$ ), while PA medial wall thickness did not change in hypoxic Tg(-) mice  
23 compared to normoxic controls.



1 The terminal bronchioles (TB) and distal acinar arterioles were examined for evidence of  
2 muscularization. The most notable findings were that the distal acinar arterioles of Tg(+)  
3 mice were muscularized at baseline and became more thickly muscularized in hypoxia  
4 unlike the Tg(-) mice arterioles as shown by elastic staining (Figure 2 Tg(+) k, l vs. Tg(-)  
5 i, j) and by immunohistochemistry with  $\alpha$ -smooth muscle actin (Figure 2 Tg(+) o, p vs.  
6 Tg(-) m, n).

7 Quantitatively, we found that TB medial wall thickness was greater in normoxic Tg(+)  
8 mice than normoxic Tg(-) mice ( $29 \pm 2\%$  vs.  $24 \pm 2\%$ ,  $p < 0.05$ , Figure 2s). The same was  
9 true of the acinar medial walls ( $26 \pm 1\%$  vs.  $21 \pm 1\%$ ,  $p < 0.05$ , Figure 2t). Under hypoxic  
10 conditions, medial wall thickness for Tg(+) mice was greater than that for Tg(-) mice in  
11 both the TBs ( $49 \pm 4\%$  vs.  $30 \pm 3\%$ ,  $p < 0.05$ , Figure 2s) and acini ( $49 \pm 1\%$  vs.  $32 \pm 2\%$ ,  
12  $p < 0.05$ , Figure 2t). In Tg(+) mice, hypoxia nearly doubled medial wall thickness for both  
13 the TB vessels ( $49 \pm 4\%$  vs.  $29 \pm 2\%$  for normoxic control,  $p < 0.05$ , Figure 2s) and acinar  
14 vessels ( $49 \pm 1\%$  vs.  $26 \pm 1\%$  for normoxic control,  $p < 0.05$ , Figure 2t). In Tg(-) mice,  
15 hypoxia induced only a 1 – 1.5-fold change in medial wall thickness for TB vessels ( $30 \pm$   
16  $3\%$  vs.  $24 \pm 2\%$  for normoxic control,  $p < 0.05$ ) and acinar vessels ( $32 \pm 2\%$  vs.  $21 \pm 1\%$   
17 for normoxic control,  $p < 0.05$ ).

18

### 19 **Hypoxia induced loss of pulmonary arterioles in IL-6 overexpressing mice.**

20 To test whether a reduction in arterioles may contribute to the increase PVR in Tg(+)  
21 mice, we compared the number of arterioles (per every 100 alveoli) in the alveolar bed of  
22 Tg(+) and Tg(-) mice. Vessel number did not significantly differ between these mice  
23 under normoxic conditions. Hypoxia reduced the number of countable arterioles at the  
24 alveolar level in both Tg(+) mice ( $7 \pm 1$  vs.  $12 \pm 1$  for normoxic control,  $p < 0.05$ ) and

1 Tg(-) mice ( $11 \pm 1$  vs.  $14 \pm 1$  for normoxic control,  $p = 0.05$ ), and the relative arteriolar  
2 reduction was similar for both groups (Online Figure I). However, Tg(+) mice had a  
3 lower number of arterioles compared to their Tg(-) littermates ( $7 \pm 1$  vs.  $11 \pm 1$ ,  $p < 0.05$ ).  
4 Therefore, the hypoxia-induced reduction in the number of distal pulmonary vessels is  
5 similar for Tg(+) and Tg(-) mice, but the absolute reduction is greater in Tg(+) mice.

6

### 7 **Characterization of Pulmonary Vasculopathy in IL-6 Tg (+) Mice: Growth Factors.**

8 To determine the factors that stimulate growth of PAEC and PASMC, immunoblot  
9 analysis of whole lung lysates (Online Figure IIa) was performed. We first confirmed  
10 that both VEGF and VEGFR2 levels were higher in Tg(+) mice than Tg(-) mice under  
11 normoxic conditions and hypoxic conditions. Transforming growth factor (TGF)- $\beta$ , a  
12 pro-apoptotic anti-proliferative protein, was reduced in Tg(+) mice compared to Tg(-)  
13 mice under normoxic conditions and hypoxic conditions, while platelet derived growth  
14 factor (PDGF) was similarly increased in all groups. This suggests that IL-6 is promoting  
15 cellular growth by up-regulating growth factor VEGF and preventing inhibition of  
16 cellular growth by down-regulating TGF- $\beta$ .

17

### 18 **Characterization of Pulmonary Vasculopathy in IL-6 Tg(+) Mice: Mitogen**

#### 19 **Activated Protein Kinases.**

20 We evaluated for evidence of signal transduction pathways that may be linking pro-  
21 growth factor responses to intracellular downstream pro-proliferative transcription  
22 factors. We found that phosphorylated extracellular regulated kinase (ERK), a pro-  
23 proliferative growth mitogen activated protein kinase (MAPK), was elevated in Tg(+)

1 lung lysates compared to Tg(-) lysates in both normoxic and hypoxic conditions (Online  
2 Figure IIb). Pro-apoptotic MAPKinases such as p38 and pJNK were not increased in  
3 Tg(+) lung lysates compared to Tg(-) lysates in both normoxic and hypoxic conditions.  
4 Taken together this would suggest that IL-6 is specifically activating pro-proliferative  
5 growth kinase ERK while preventing the activation of kinases that promote apoptosis.

6

### 7 **Characterization of Pulmonary Vasculopathy in IL-6 Tg(+) Mice: Pro-Proliferative** 8 **and Anti-Apoptotic Targets.**

9 Given that cellular proliferation is increased within the walls of the pulmonary  
10 vasculature of the IL-6 Tg(+) mice (Figure 4 k, l, and o) and proliferative MAPK ERK is  
11 increased (Online Figure IIb), we evaluated for evidence of downstream proliferative  
12 transcription factors. We found that c-myc, a basic-helix-loop-helix/leucine zipper  
13 transcription factor that controls the G1-S cell cycle promoting cellular growth and  
14 proliferation,<sup>8</sup> was elevated in Tg(+) mice relative to their Tg(-) counterparts under  
15 normoxic and hypoxic conditions (Online Figure IIc). In addition, c-Myc's obligate  
16 binding partner, MAX, was also exclusively elevated in Tg(+) mice relative to their Tg(-)  
17 counterparts under normoxic and hypoxic conditions. This suggests that IL-6 may be  
18 inducing cellular growth and proliferation and subsequent pulmonary vascular wall  
19 remodeling by up-regulating pro-proliferative oncogenic transcription proteins.

20

21 Given that the growth inhibitor TGF- $\beta$ , and two MAPKinases that stimulate downstream  
22 apoptotic signals, phosphorylated 38 and JNK, are reduced, we investigated if

1 downstream pro-apoptotic caspase 3 is modulated by IL-6 in these mice. Cleaved  
2 caspase 3 activity was increased in IL-6 Tg(+) mice at baseline compared to Tg(-) mice.  
3 However in hypoxia cleaved caspase 3 activity was reduced in Tg(+) mice compared  
4 with baseline room air conditions (Online Figure IId). In order to determine if  
5 programmed cell death is occurring in the distal arteriolar lesions, we looked for DNA  
6 fragmentation, a marker of apoptosis, and observed that in the IL-6 Tg(+) mice, there was  
7 DNA fragmentation in epithelial cells and possibly in histiocytes of alveolar units but not  
8 in the walls of the distal arterioles (Online Figure IIe). Taken together, IL-6  
9 overexpression may be selectively preventing programmed cell death by apoptosis within  
10 the pulmonary vascular bed.

11

12 To determine which anti-apoptotic proteins may be involved in inhibiting caspase 3 and  
13 preventing subsequent cell death within the vascular bed, we probed for two important  
14 anti-apoptotic proteins, Bcl-2 and survivin. We found that Bcl-2 was elevated in Tg(+)  
15 mice relative to their Tg(-) counterparts under normoxic and hypoxic conditions (Online  
16 Figure IId) while pro-apoptotic protein BAX levels were similar in Tg(-) and Tg(+) mice  
17 and remained unchanged in hypoxic conditions. We found that survivin is markedly  
18 elevated in Tg(+) mice compared to Tg(-) mice at baseline and in hypoxia (Online Figure  
19 IId). This suggests that IL-6 may be inducing a pro-survival cellular state by modulating  
20 several anti-apoptotic proteins.

21

22 **Characterization of Lymphocyte Recruitment and Function.**

1 To determine the signals that IL-6 employs to control the recruitment of lymphocytes, we  
2 probed for chemokines that are known to be involved in lymphocyte trafficking. We  
3 found that Tg (+) mice had elevated levels of activated fractalkine (c-CX<sub>3</sub>CL1), a PAEC-  
4 derived chemokine that recruits T cells and mediates T cell adhesion to endothelial cells,  
5 at baseline and in hypoxic conditions (Online Figure III). Monocyte chemoattractant  
6 protein, MCP-1, a chemokine that recruits monocytes and lymphocytes and may have a  
7 role in smooth muscle cell proliferation was increased in IL-6 Tg (+) mice at room air but  
8 was reduced in hypoxia (Online Figure III). Tumor necrosis factor (TNF)-alpha was  
9 reduced in both normoxic and hypoxic conditions in the IL-6 Tg (+) mice compared to  
10 Tg (-) mice. Nuclear factor of activated T-cells, cytoplasmic, calcineurin-3 (NF-ATc3),  
11 which may have a role in promoting a state of proliferation and suppress mitochondrial-  
12 dependent apoptosis<sup>9</sup>, was slightly increased in IL-6 Tg (+) mice whole lung lysates  
13 (Online Figure III). Taken together, this data supports the concept that overexpression of  
14 IL-6 stimulates the recruitment of T cells through up-regulation of specific chemokines  
15 depending on the presence or absence of hypoxia and stimulates T cells to home to distal  
16 pulmonary arteriole vessels. In turn, T cells may be enhancing IL-6's pro-survival  
17 apoptotic resistant cellular phenotypic effects.

18

## 19 **Discussion**

### 20 **IL-6 and cMyc/MAX Expanded**

21 IL-6 overexpression may predispose to exaggerated PAH as a result of coordinating a  
22 number of downstream pro-proliferative, pro-survival, and anti-apoptotic signaling  
23 pathways (Figure 6). We found that c-myc, and its obligate binding partner, MAX may

1 be key in IL-6's downstream proliferative signal cascade, promoting cellular proliferative  
2 phenotypes in PAH. Consistent with our findings, endothelin stimulated rat aortic  
3 smooth muscle cells are shifted into a pro-proliferative state in the presence of ERK  
4 induced c-myc activation.<sup>10</sup> It also has been shown that pulmonary arteries from rats  
5 exposed to hypoxia have elevated levels of c-myc mRNA.<sup>11</sup> In addition, YY1 growth  
6 regulator of vascular smooth muscle cells targets c-myc downstream leading to increased  
7 smooth muscle specific gene expression, proliferation and neonatal piglet pulmonary  
8 hypertension.<sup>12</sup> Furthermore, in the presence of TGF- $\beta$ /BMP proteins, c-myc expression  
9 is attenuated contributing to PASMC apoptosis.<sup>13</sup> How the c-myc/max complex may be  
10 altering its target cell cycle genes and whether the additional stress of hypoxia may alter  
11 its effects on downstream targets is unclear at present. However, given the number of  
12 angioproliferative lesions at baseline, which likely results in localized hypoxia, and the  
13 increase in the number of lesions in hypoxia, we hypothesize, based on extensive work in  
14 tumor hypoxia deprivation biology,<sup>8</sup> that hypoxia inducible factors may be facilitating  
15 the formation of c-myc-max complex and thereby augmenting the expression of cell  
16 cycle genes and exaggerating the hyper-proliferative cellular phenotypes in this transgene  
17 mouse. Further investigation with this IL-6 Tg(+) mouse will allow us to evaluate the  
18 role of IL-6 in the presence of hypoxia and associated physiologic changes thus imposed  
19 by hypoxic vasoconstriction.

20

### 21 **IL-6 and Apoptosis Expanded**

22 While IL-6 appears to be driving a number of proteins that promote cellular proliferation,  
23 it is also clear from our work that IL-6 is also affecting apoptosis by down regulating

1 TGF- $\beta$  and pro-apoptotic MAPKs, pJNK and p38 (Figure 6). As with hyperoxic injury in  
2 Tg(+) mice<sup>14</sup> and H<sub>2</sub>O<sub>2</sub> injury in IL-6 stimulated endothelial cells,<sup>15</sup> caspase 3, the main  
3 gate keeper to programmed cell death, appears to be activated at baseline and is  
4 subsequently down-regulated when under the stress of hypoxia. However, evidence for  
5 DNA fragmentation, a marker of apoptosis, is observed only in epithelial cells and  
6 possibly histiocytes lining the alveoli, not in the cells of the obliterative lesions of the  
7 distal pulmonary vasculature at baseline or in hypoxia. This would suggest that IL-6's  
8 role in preventing cell death by apoptosis is PA wall specific at baseline and persists in  
9 hypoxia. Dysregulation of mediators of apoptosis in the PA wall of patients with PAH  
10 favoring suppression of apoptosis has been shown in gene microarray studies.<sup>16</sup> Anti-  
11 apoptotic proteins Bcl-2 and survivin have been found to be up-regulated in patients with  
12 PAH<sup>16,17</sup> where they are thought to impair the activity of Kv channels<sup>17,18</sup> and subsequent  
13 mitochondria-dependent apoptosis.<sup>19</sup> Similar to patients with PAH, IL-6 Tg(+) mice also  
14 share a similar anti-apoptotic biology with increased expression of both bcl-2 and  
15 survivin. At present, it remains unclear what triggers induced by IL-6 modulate the  
16 expression of these two anti-apoptotic proteins. However it is clear that DNA  
17 fragmentation within the complex obliterative vascular lesions of L-6 Tg(+) mice is  
18 absent favoring a pro-proliferative cell state, as observed in angioproliferative lesions of  
19 patients with PAH.

20

### 21 **IL-6 and Inflammation Expanded**

22 Elevation of IL-6 in PAH patients suggests that cellular immunity may play an active role  
23 in the dysregulation of PAEC and PASMC and the development of PAH. Accordingly,

1 plexigenic and concentric lesions in patients with severe PAH contain inflammatory cells,  
2 consisting of T cells, macrophages, and to a lesser extent, B cells<sup>20,21</sup>. Similarly, the  
3 obliterative complex distal arterial lesions in Tg(+) mice also contain an abundance of T  
4 cells and to a lesser extent, B cells, while B cells appear to surround the large and mid  
5 sized airways.<sup>22</sup> The mechanisms underlying inflammatory cell recruitment and  
6 transendothelial migration into pulmonary artery vessel walls during PAH are unclear,  
7 although the chemokines RANTES<sup>23</sup> and fractalkine<sup>24</sup> may participate in inflammatory  
8 cell trafficking.<sup>25</sup> Hyper-proliferative PAEC may mediate the adhesion of the T  
9 lymphocytes by over-expressing fractalkine, as the cleaved activated form of fractalkine  
10 is up-regulated in the lungs of IL-6 Tg(+) mice as well as in plexigenic lesions of  
11 patients.<sup>24</sup> Further work examining T lymphocyte trafficking in Tg(+) mice will be  
12 instrumental in understanding their role in the vascular changes seen in patients with  
13 PAH.

14         There has been much controversy regarding the role of T cells in PAH, where T  
15 cell-mediated immunity has been found to be protective against PAH in VEGFR blocker  
16 treated nude rats<sup>5</sup> while in antigen challenged mice the Th2 immune response is  
17 associated with vascular muscularization.<sup>26</sup> In the IL-6 Tg(+) mouse, IL-6 and T cells  
18 may have a trans-signaling relationship, whereby T cell activation driven by IL-6  
19 contributes to the perpetuation of IL-6's pro-inflammatory pro-proliferative anti-  
20 apoptotic effects on neighboring PASM and PAEC (Figure 6). Such a relationship has  
21 been thought to have been an important mechanism underlying other chronic  
22 inflammatory diseases,<sup>27</sup> and may be one of the many important IL-6 mechanisms  
23 involved in the pathogenesis of PAH. NFAT proteins, produced and carried to PA



1 vessels in lymphocytes have recently been noted to be activated in human PAH and may  
2 be contributing to the resistance to apoptosis within the PA wall. In IL-6 Tg(+) mice,  
3 NF-ATc3 was only slightly increased in the IL-6 Tg(+) mice compared with Tg(-) mice  
4 at baseline and in hypoxia, and therefore may or may not be associated with PAEC and  
5 PASMC insensitivity to apoptosis. Its significance may be under-represented by the lack  
6 of cell specificity as it was tested in whole lung lysates. Taken together, T cells in an IL-  
7 6 rich milieu are prominently situated within the distal arteriolar vessels, and further work  
8 to evaluate their role, whether protective or stimulatory, will be key to understanding  
9 their presence in human PAH disease.

10

#### 11 **IL-6 and Loss of PA vessels Expanded**

12 Whether the loss of small pulmonary arteriolar vessels contributes to the development of  
13 PVR is controversial. The importance of this loss may be negligible since chronic  
14 hypoxic experimental PAH models have considerable angiogenesis<sup>28</sup> and Rho kinase  
15 inhibitors normalize pulmonary pressures during chronic hypoxia via vasodilation.<sup>29</sup>  
16 However, vessel loss is induced by many other experimental PAH stimuli, including  
17 injection of monocrotaline,<sup>30</sup> monocrotaline combined with pneumonectomy,<sup>31,32</sup> chronic  
18 hyperoxia,<sup>32</sup> and creation of aortopulmonary shunts.<sup>33</sup> Clinically, artery loss occurs in  
19 idiopathic PAH,<sup>34</sup> as well as in conditions associated with PAH, including congenital  
20 heart disease<sup>35</sup> and lung developmental abnormalities.<sup>36</sup> Here, hypoxia induced a  
21 significant loss of distal arterioles in Tg(+) mice, which are known to have abnormal  
22 alveoli with enlarged terminal air sacs.<sup>1</sup> This altered anatomy, which may result in a  
23 significant decrease in the number of arterioles, could significantly contribute to

1 increased PVR. We found no significant differences in vessel number between Tg(-) and  
2 (+) mice under normoxic conditions and the hypoxia-induced arteriolar reduction was  
3 similar between groups, despite a significant increase in PVR in Tg(+) hypoxic mice.  
4 Thus, arterial vessel loss alone may not account for increased PVR in IL-6 Tg(+) mice.

5  
6

7 **References:**

8

9 **1.** Ward NS, Waxman AB, Homer RJ, Mantell LL, Einarsson O, Du Y, Elias JA.

10 Interleukin-6-Induced Protection in Hyperoxic Acute Lung Injury. *Am J Respir*  
11 *Cell Mol Biol.* 2000;22:535-542.

12 **2.** Zhu YJ, Kradin R, Brandstetter RD, Staton G, Moss J, Hales CA. Hypoxic  
13 pulmonary hypertension in the mast cell-deficient mouse. *Journal of Applied*  
14 *Physiology: Respiratory, Environmental & Exercise Physiology.* 1983;54:680-  
15 686.

16 **3.** Quinn DA, Du HK, Thompson BT, Hales CA. Amiloride analogs inhibit chronic  
17 hypoxic pulmonary hypertension. *American Journal of Respiratory & Critical*  
18 *Care Medicine.* 1998;157:1263-1268.

19 **4.** Merklinger SL, Wagner RA, Spiekerkoetter E, Hinek A, Knutsen RH, Kabir MG,  
20 Desai K, Hacker S, Wang L, Cann GM, Ambartsumian NS, Lukanidin E,  
21 Bernstein D, Husain M, Mecham RP, Starcher B, Yanagisawa H, Rabinovitch M.  
22 Increased fibulin-5 and elastin in S100A4/Mts1 mice with pulmonary  
23 hypertension. *Circulation Research.* 2005;97:596-604.

- 1 **5.** Taraseviciene-Stewart L, Nicolls MR, Kraskauskas D, Scerbavicius R, Burns N,  
2 Cool C, Wood K, Parr JE, Boackle SA, Voelkel NF. Absence of T cells confers  
3 increased pulmonary arterial hypertension and vascular remodeling. *American*  
4 *Journal of Respiratory & Critical Care Medicine*. 2007;175:1280-1289.
- 5 **6.** Habasque C, Satie AP, Aubry F, Jegou B, Samson M. Expression of fractalkine in  
6 the rat testis: molecular cloning of a novel alternative transcript of its gene that is  
7 differentially regulated by pro-inflammatory cytokines. *Mol Hum Reprod*.  
8 2003;9:449-455.
- 9 **7.** Raoul W, Wagner-Ballon O, Saber G, Hulin A, Marcos E, Giraudier S,  
10 Vainchenker W, Adnot S, Eddahibi S, Maitre B. Effects of bone marrow-derived  
11 cells on monocrotaline- and hypoxia-induced pulmonary hypertension in mice.  
12 *Respir Res*. 2007;8:8.
- 13 **8.** Huang LE. Carrot and stick: HIF-alpha engages c-Myc in hypoxic adaptation.  
14 *Cell Death Differ*. 2008;15:672-677.
- 15 **9.** Bonnet S, Rochefort G, Sutendra G, Archer SL, Haromy A, Webster L,  
16 Hashimoto K, Bonnet SN, Michelakis ED. The nuclear factor of activated T cells  
17 in pulmonary arterial hypertension can be therapeutically targeted. *Proc Natl*  
18 *Acad Sci U S A*. 2007;104:11418-11423.
- 19 **10.** Chen S, Qiong Y, Gardner DG. A role for p38 mitogen-activated protein kinase  
20 and c-myc in endothelin-dependent rat aortic smooth muscle cell proliferation.  
21 *Hypertension*. 2006;47:252-258.

- 1 **11.** Cai Y, Han M, Luo L, Song W, Zhou X. Increased expression of PDGF and c-  
2 myc genes in lungs and pulmonary arteries of pulmonary hypertensive rats  
3 induced by hypoxia. *Chin Med Sci J.* 1996;11:152-156.
- 4 **12.** Favot L, Hall SM, Haworth SG, Kemp PR. Cytoplasmic YY1 is associated with  
5 increased smooth muscle-specific gene expression: implications for neonatal  
6 pulmonary hypertension. *Am J Pathol.* 2005;167:1497-1509.
- 7 **13.** Fantozzi I, Platoshyn O, Wong AH, Zhang S, Remillard CV, Furtado MR,  
8 Petrauskene OV, Yuan JX. Bone morphogenetic protein-2 upregulates expression  
9 and function of voltage-gated K<sup>+</sup> channels in human pulmonary artery smooth  
10 muscle cells. *Am J Physiol Lung Cell Mol Physiol.* 2006;291:L993-1004.
- 11 **14.** Ward NS, Waxman AB, Homer RJ, Mantell LL, Einarsson O, Du Y, Elias JA.  
12 Interleukin-6-induced protection in hyperoxic acute lung injury. *American*  
13 *Journal of Respiratory Cell & Molecular Biology.* 2000;22:535-542.
- 14 **15.** Waxman AB, Mahboubi K, Knickelbein RG, Mantell LL, Manzo N, Pober JS,  
15 Elias JA. Interleukin-11 and Interleukin-6 Protect Cultured Human Endothelial  
16 Cells from H<sub>2</sub>O<sub>2</sub>-Induced Cell Death. *Am J Respir Cell Mol Biol.*  
17 2003;29:513-522.
- 18 **16.** Geraci MW, Moore M, Gesell T, Yeager ME, Alger L, Golpon H, Gao B, Loyd  
19 JE, Tuder RM, Voelkel NF. Gene expression patterns in the lungs of patients with  
20 primary pulmonary hypertension: a gene microarray analysis. *Circulation*  
21 *Research.* 2001;88:555-562.
- 22 **17.** McMurtry MS, Archer SL, Altieri DC, Bonnet S, Haromy A, Harry G, Bonnet S,  
23 Puttagunta L, Michelakis ED. Gene therapy targeting survivin selectively induces

- 1 pulmonary vascular apoptosis and reverses pulmonary arterial hypertension.[see  
2 comment]. *Journal of Clinical Investigation*. 2005;115:1479-1491.
- 3 **18.** Ekhterae D, Platoshyn O, Krick S, Yu Y, McDaniel SS, Yuan JX. Bcl-2 decreases  
4 voltage-gated K<sup>+</sup> channel activity and enhances survival in vascular smooth  
5 muscle cells. *Am J Physiol Cell Physiol*. 2001;281:C157-165.
- 6 **19.** Altieri DC. Validating survivin as a cancer therapeutic target. *Nat Rev Cancer*.  
7 2003;3:46-54.
- 8 **20.** Tuder RM, Groves B, Badesch DB, Voelkel NF. Exuberant endothelial cell  
9 growth and elements of inflammation are present in plexiform lesions of  
10 pulmonary hypertension.[see comment]. *Am J Pathol*. 1994;144:275-285.
- 11 **21.** Cool CD, Kennedy D, Voelkel NF, Tuder RM. Pathogenesis and evolution of  
12 plexiform lesions in pulmonary hypertension associated with scleroderma and  
13 human immunodeficiency virus infection. *Human pathology*. 1997;28:434-442.
- 14 **22.** DiCosmo BF, Geba GP, Picarella D, Elias JA, Rankin JA, Stripp BR, Whitsett  
15 JA, Flavell RA. Airway epithelial cell expression of interleukin-6 in transgenic  
16 mice. Uncoupling of airway inflammation and bronchial hyperreactivity. *Journal*  
17 *of Clinical Investigation*. 1994;94:2028-2035.
- 18 **23.** Dorfmuller P, Zarka V, Durand-Gasselini I, Monti G, Balabanian K, Garcia G,  
19 Capron F, Coulomb-Lhermine A, Marfaing-Koka A, Simonneau G, Emilie D,  
20 Humbert M. Chemokine RANTES in severe pulmonary arterial hypertension.  
21 *American Journal of Respiratory & Critical Care Medicine*. 2002;165:534-539.
- 22 **24.** Balabanian K, Foussat A, Dorfmuller P, Durand-Gasselini I, Capel F, Bouchet-  
23 Delbos L, Portier A, Marfaing-Koka A, Krzysiek R, Rimaniol AC, Simonneau G,

- 1 Emilie D, Humbert M. CX(3)C chemokine fractalkine in pulmonary arterial  
2 hypertension.[see comment]. *American Journal of Respiratory & Critical Care*  
3 *Medicine*. 2002;165:1419-1425.
- 4 **25.** Springer TA. Traffic signals for lymphocyte recirculation and leukocyte  
5 emigration: the multistep paradigm. *Cell*. 1994;76:301-314.
- 6 **26.** Daley E, Emson C, Guignabert C, de Waal Malefyt R, Louten J, Kurup V,  
7 Hogaboam C, Taraseviciene-Stewart L, Voelkel N, Rabinovitch M, Grunig E,  
8 Grunig G. Pulmonary arterial remodeling induced by a Th2 immune response.  
9 *The Journal of Experimental Medicine*. 2008;205:361-372.
- 10 **27.** Atreya R, Mudter J, Finotto S, Mullberg J, Jostock T, Wirtz S, Schutz M, Bartsch  
11 B, Holtmann M, Becker C, Strand D, Czaja J, Schlaak JF, Lehr HA, Autschbach  
12 F, Schurmann G, Nishimoto N, Yoshizaki K, Ito H, Kishimoto T, Galle PR, Rose-  
13 John S, Neurath MF. Blockade of interleukin 6 trans signaling suppresses T-cell  
14 resistance against apoptosis in chronic intestinal inflammation: evidence in crohn  
15 disease and experimental colitis in vivo. *Nat Med*. 2000;6:583-588.
- 16 **28.** Howell K, Preston RJ, McLoughlin P. Chronic hypoxia causes angiogenesis in  
17 addition to remodelling in the adult rat pulmonary circulation. *J Physiol (Lond)*.  
18 2003;547:133-145.
- 19 **29.** Hyvelin JM, Howell K, Nichol A, Costello CM, Preston RJ, McLoughlin P.  
20 Inhibition of Rho-kinase attenuates hypoxia-induced angiogenesis in the  
21 pulmonary circulation. *Circulation Research*. 2005;97:185-191.

- 1 **30.** Ye CL, Rabinovitch M. Inhibition of elastolysis by SC-37698 reduces  
2 development and progression of monocrotaline pulmonary hypertension.  
3 *American Journal of Physiology.* 1991;261:H1255-1267.
- 4 **31.** O'Blenes SB, Fischer S, McIntyre B, Keshavjee S, Rabinovitch M. Hemodynamic  
5 unloading leads to regression of pulmonary vascular disease in rats.[see  
6 comment]. *J Thorac Cardiovasc Surg.* 2001;121:279-289.
- 7 **32.** Koppel R, Han RN, Cox D, Tanswell AK, Rabinovitch M. Alpha 1-antitrypsin  
8 protects neonatal rats from pulmonary vascular and parenchymal effects of  
9 oxygen toxicity. *Pediatr Res.* 1994;36:763-770.
- 10 **33.** Rendas A, Lennox S, Reid L. Aorta-pulmonary shunts in growing pigs.  
11 Functional and structural assessment of the changes in the pulmonary circulation.  
12 *J Thorac Cardiovasc Surg.* 1979;77:109-118.
- 13 **34.** Meyrick B, Clarke SW, Symons C, Woodgate DJ, Reid L. Primary pulmonary  
14 hypertension: a case report including electronmicroscopic study. *Br J Dis Chest.*  
15 1974;68:11-20.
- 16 **35.** Rabinovitch M, Keane JF, Norwood WI, Castaneda AR, Reid L. Vascular  
17 structure in lung tissue obtained at biopsy correlated with pulmonary  
18 hemodynamic findings after repair of congenital heart defects. *Circulation.*  
19 1984;69:655-667.
- 20 **36.** Bohn D, Tamura M, Perrin D, Barker G, Rabinovitch M. Ventilatory predictors of  
21 pulmonary hypoplasia in congenital diaphragmatic hernia, confirmed by  
22 morphologic assessment. *J Pediatr.* 1987;111:423-431.
- 23

1 **Legend (Supplement)**

2

3 **Online Figure I** The number of arteries per 100 alveoli in IL-6 Tg(+) and Tg(-) mice in  
4 normoxic conditions are similar at baseline. Under hypoxic conditions, the number of  
5 arteries per 100 alveoli are reduced in both Tg(+) and Tg(-) mice (‡ vs. normoxic  
6 Tg(+);p<0.05, † vs. normoxic Tg(-);p<0.05) with IL-6 Tg(+) mice having the highest  
7 reduction (‡ vs. hypoxic Tg(-);p<0.05).

8 **Online Figure II (a)** Representative immunoblot protein expression of TGF- $\beta$ , PDGF,  
9 VEGF, and VEGFR2 of lung lysates from IL-6 Tg(+) and Tg(-) mice exposed to  
10 normoxia and 3 weeks of hypoxia. **(b)** Representative immunoblot protein expression of  
11 phosphorylated ERK 42, ERK 42/44, phosphorylated p38, p38, phosphorylated JNK-1  
12 and JNK2/3, and JNK. **(c)** Representative immunoblot protein expression of PCNA, c-  
13 myc, and MAX. **(d)** Representative immunoblot protein expression of survivin, Bcl-2,  
14 BAX, cleaved caspase-3, and caspase 3.  $\beta$ -actin used as control. **(e)** Representative  
15 photomicrographs of distal acinar arterioles of the PA vasculature of IL-6 Tg(+) and Tg(-  
16 ) mice in normoxic and hypoxic conditions exposed to TdT-mediated dUTP nick end  
17 labeling (TUNEL) for DNA fragmentation evaluation. The distal arterioles (arrow with  
18 dark circle) and specifically the occlusive lesions in Tg(+) mice at baseline and in  
19 hypoxia have no evidence of DNA fragmentation, while epithelial cells and possibly  
20 histiocytes lining the alveolar walls are TUNEL positive at baseline (arrow, see inset).  
21 TUNEL staining, magnification x400, bar=0.001mm and inset, magnification x1000,  
22 bar=0.0005mm.  $\beta$ -actin used as a control.

23



1 **Online Figure III** Representative immunoblot protein expression of TNF- $\alpha$ , MCP-1,  
2 cleaved chemokine fractalkine (c-CX<sub>3</sub>CL1), total CX<sub>3</sub>CL1, NF-ATc3, T cells (CD3) and  
3 B cells (CD19) in whole lung lysates of IL-6 Tg (+) and Tg (-) mice exposed to normoxia  
4 and 3 weeks of hypoxia.  $\beta$ -actin used as a control.  
5

Online Figure I

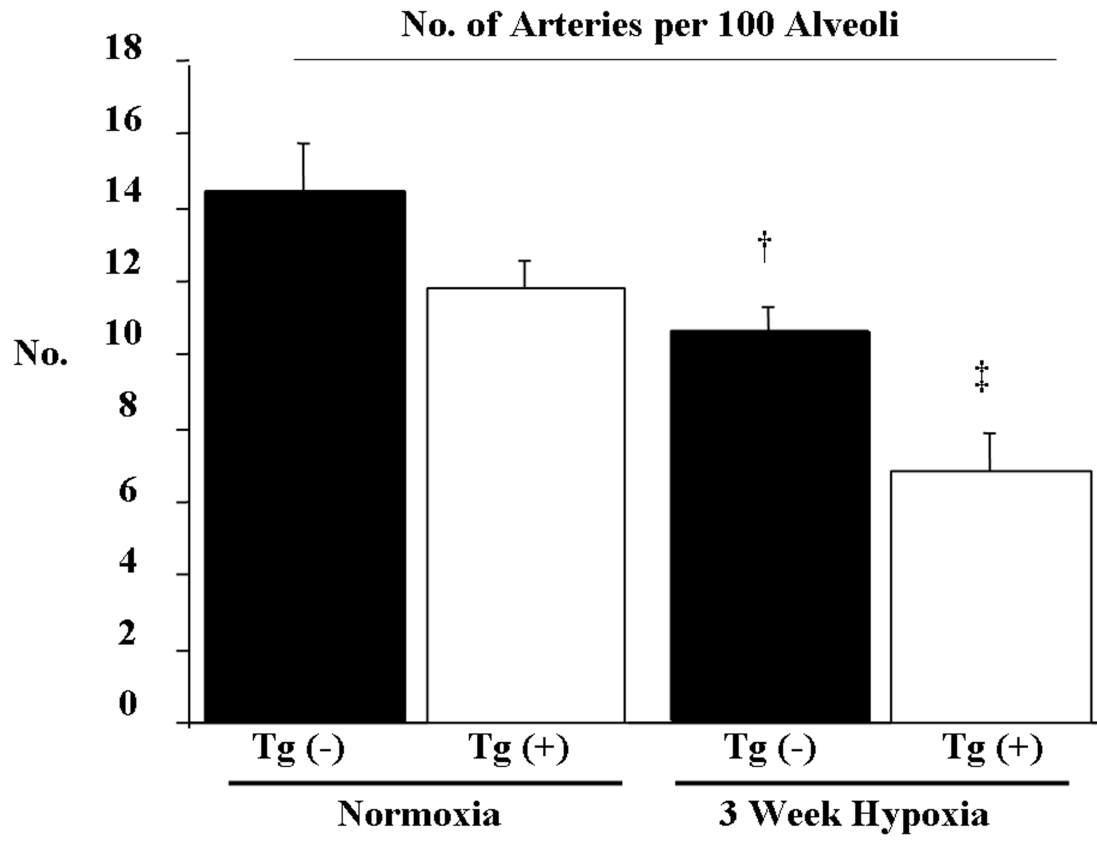

Online Figure II

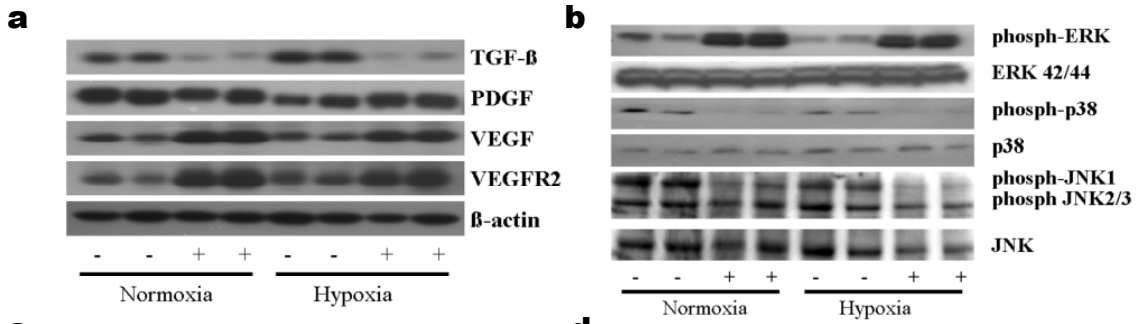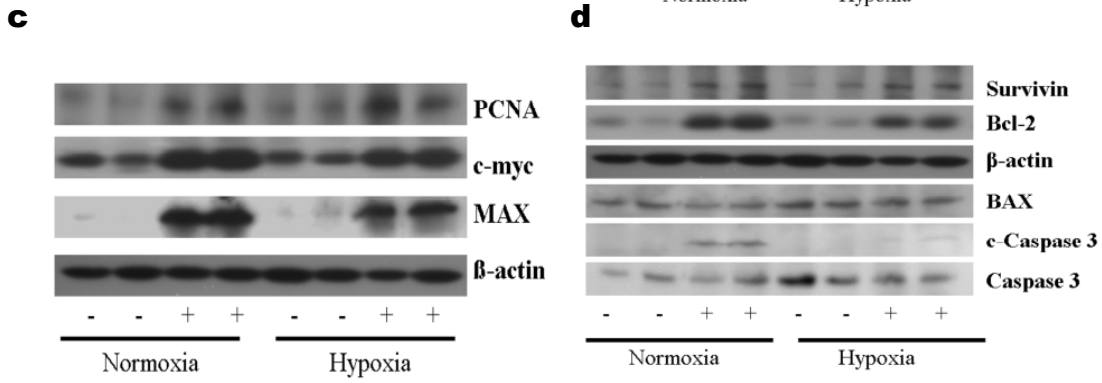

**e**

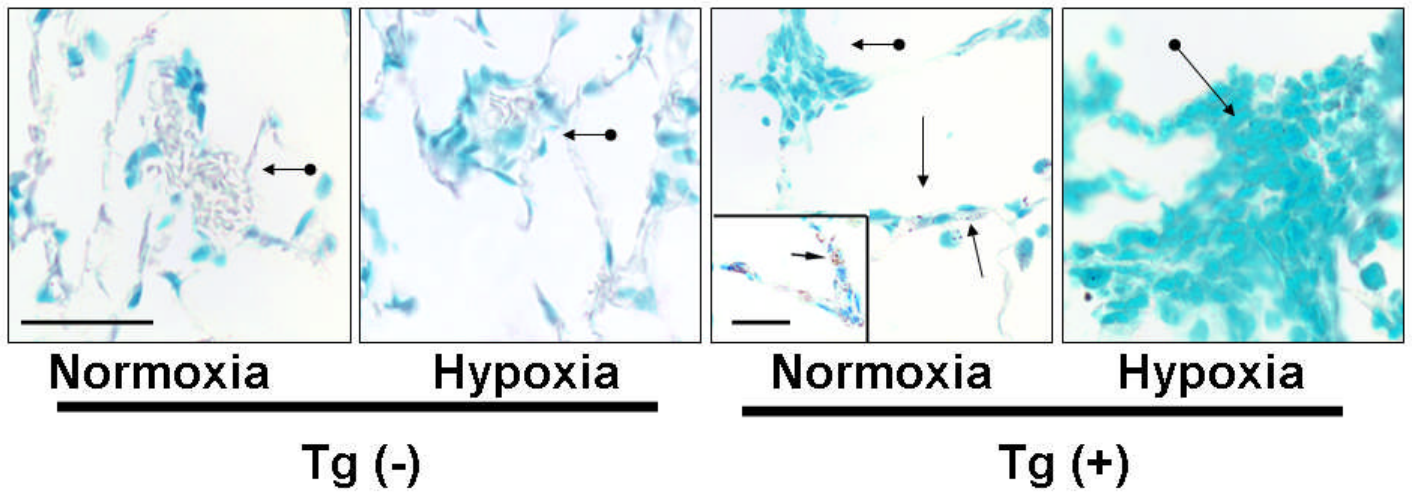

Supplement: NIHMS126773-supplement-1.pdf [file NIHMS126773-supplement-1.pdf]
